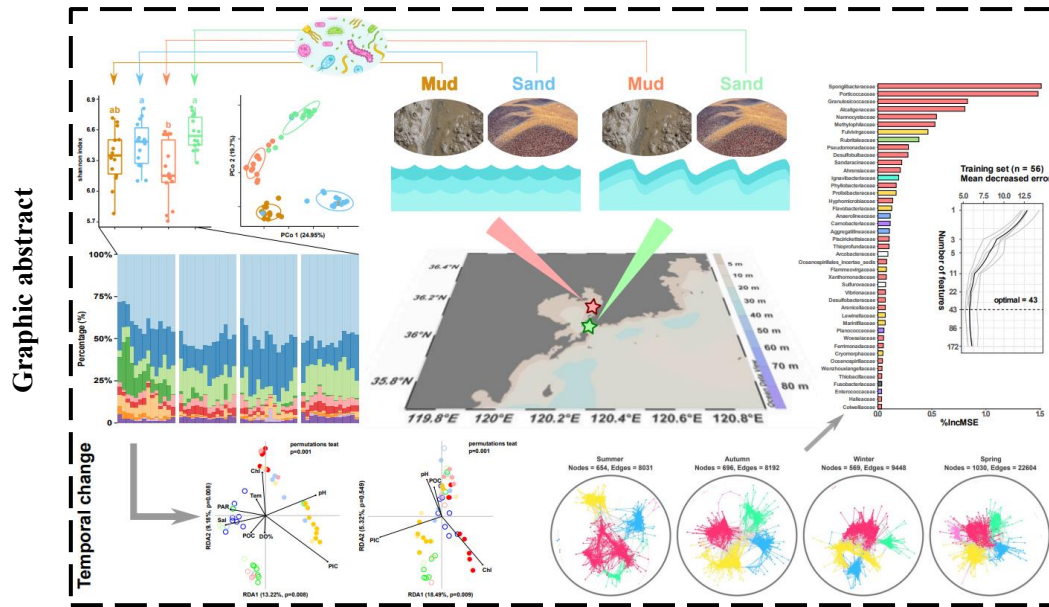

17

18 **Highlights:**

- 19 ● Sandy sediments have more bacterial species involved in community building.
- 20 ● Different substrates from different stations have their own phylum biomarkers.
- 21 ● Substrates have a greater influence on shaping bacterial function.
- 22 ● Temporal changes have a greater shaping power on bacteria than on gene families.

23

24 **Abstract:** The intertidal sediment environment is dynamic and the biofilm bacterial community  
 25 within it must constantly adjust, but an understanding of the differences in the biofilm bacterial  
 26 community within sediments of different types is still relatively limited. In this study, the structure  
 27 of the bacterial community in Jiaozhou Bay sediment biofilms are described using high-throughput  
 28 16S rRNA gene sequencing and the effects of temporal change and different sediment environment  
 29 types are discussed. The Shannon index was significantly higher in sandy samples than in muddy  
 30 samples. The co-occurrence network was tighter and more species were involved in community  
 31 building in sandy samples. The principal coordinates analysis identified a significant separation  
 32 between different sediment types and between stations (LiCun estuary, LC and ZhanQiao Pier, ZQ).

33 Proteobacteria, which had a relative abundance of approximately 50% at all phylum levels, was  
34 significantly more abundant at ZQ, while Campilobacterota and Firmicutes were significantly more  
35 abundant at LC. The relative abundances of Bacteroidetes, Campilobacterota, Firmicutes, and  
36 Chloroflexi were significantly higher in the muddy samples, while Actinobacteria and  
37 Proteobacteria were higher in the sandy samples. There were different phylum-level biomarkers  
38 between sediment types at different stations. There were also different patterns of functional  
39 enrichment in biogeochemical cycles between sediment types and stations with the former having  
40 more gene families that differed significantly, highlighting their greater role in determining bacterial  
41 function. The RDA results, where each month's samples were concentrated individually, showed  
42 reduced variation between months when the amplicon sequence variant was replaced by KEGG  
43 orthologs, presumably the temporal change had an impact on shaping the intertidal sediment  
44 bacterial community, although this was less clear at the gene family level. Random forest prediction  
45 yielded a combination of 43 family-level features that responded well to temporal change, reflecting  
46 the influence of temporal change on sediment biofilm bacteria.

47 **Keywords: Biofilm; Seasonal variation; Grain size; LEfSe; Gene function**

48

## 49 **1 Introduction**

50 The intertidal zone is a transition zone between land and sea where the sediment environment  
51 is constantly changing under the combined influence of freshwater, tidal and anthropogenic factors.  
52 Studies have shown that the sediment surface has high microbial activity, which is sensitive to  
53 environmental changes and can be an indicator of ecological health (Duarte et al., 2012; Kallmeyer  
54 et al., 2012; Suh et al., 2015; Yi et al., 2020). In addition to microorganisms on the surface of

55 intertidal sediments that adhere and aggregate into marine biofilms, marine biofilms are also  
56 widespread on the surface of other biotic or abiotic substrates immersed in seawater and play an  
57 important role in biogeochemical cycles (Wahl et al., 2012; Dang and Lovell, 2016; Liang et al.,  
58 2019).

59 Bacteria are the pioneer and most abundant taxa in biofilms, and their diversity and aggregation  
60 state are significantly influenced by water quality, salinity and hydrodynamics (Rickard et al., 2004;  
61 Nocker et al., 2007; Qian et al., 2007; Guo et al., 2017). Rapid fluctuations in intertidal  
62 environmental conditions (e.g., pH, salinity, ionic strength, currents and contaminants) result in a  
63 metabolically plastic and genetically diverse community of bacteria. Understanding how changes  
64 in the distribution and function of these communities and the extent to which anthropogenic and  
65 natural factors influence them is essential for assessing ecological impacts (Lv et al., 2016; Wei et  
66 al., 2018; Avila-Jimenez et al., 2020; Ge et al., 2021). With the development and maturity of  
67 sequencing technology, in particular using high-throughput 16S rRNA gene sequencing technology,  
68 it has become possible to study community composition at a lower cost, with greater accuracy and  
69 efficiency.

70 Tidal, current and invertebrate disturbance have different effects on the erosion of the surface  
71 layer of intertidal sediments with different grain sizes (Grabowski et al., 2011). Sandy sediments  
72 have high permeability but low interparticle cohesion, whereas muddy sediments have smaller  
73 particle sizes, higher cohesion and increased stability, so surface migration differs between the two  
74 sediment types. In addition, sediment mobility is also influenced by the biofilms themselves  
75 (Paterson, 1989; Whitehouse, 2000; Wyness et al., 2019). However, an understanding of the  
76 structural differences in intertidal biofilm bacterial communities in different substrate types is still

77 relatively limited. Therefore, it is hypothesised that intertidal muddy and sandy sediments shape  
78 bacterial communities differently. In this study, Jiaozhou Bay, a temperate bay with different  
79 sediment types, was chosen as a study model.

80 Jiaozhou Bay (Shandong, China) is a semi-enclosed bay with a relatively narrow mouth (2.5  
81 km) that restricts water exchange to the Yellow Sea and limits its capacity to self-purify (Dai et al.,  
82 2007; Sun et al., 2021). It's semi-enclosed configuration results in low wave energy. It has a  
83 temperate monsoon climate, semi-diurnal tides (mean tidal range 2.8 m) and high current velocities  
84 (up to 201 cm/s) at the mouth of the bay (Lyu et al., 2010; Liu et al., 2014; Shang et al., 2018). The  
85 Licun River, which flows into the bay, has a population of more than one million people within its  
86 catchment. A large sewage treatment plant discharges into the Licun River ( $2.46 \times 10^5$  t/d). A eddy  
87 in the estuary attenuates the movement of material out of the bay (Wang et al., 2022; Zhang et al.,  
88 2017). Previous studies have investigated the diversity of culturable bacteria (Wang et al., 2016),  
89 the diversity of anaerobic bacteria (Wu et al., 2019), the *nirS*-type denitrifying bacterial community  
90 (Liu et al., 2020), the late winter/early spring bacterial community in the estuarine zone (Ge et al.,  
91 2021), and the spatial distribution of bacteria in autumn (Sun et al., 2021) in surface sediments of  
92 Jiaozhou Bay, but investigations of bacterial community structure between seasons and substrates  
93 are need to be complemented.

94 In a monthly sampling program for almost a year, the bacterial community structure of the  
95 intertidal sediments in the bay and at the mouth of the bay is described using high-throughput 16S  
96 rRNA gene sequencing methods. The aim is to identify potential patterns in the composition of  
97 bacterial communities in the sediment biofilms, and the effects of temporal changes and sediment  
98 environment on them. The results will improve our understanding of the endemic structure of

99 bacterial communities shaped by different substrate sediments in the intertidal zone and provide the  
100 empirical support necessary for ecological conservation.

101

## 102 **2 Materials and Methods**

### 103 2.1 Sampling design

104 The sampling sites were at two locations in Jiaozhou Bay - the south side of the LiCun estuary  
105 (LC, 36.15 N 120.34 E) and a beach on the east side of the ZhanQiao Pier (ZQ, 36.06 N 120.31 E),  
106 inside and outside the mouth of the bay respectively, a linear separation of approximately 10.5 km.  
107 Samples were collected monthly over a period of 326 days (Fig. 1). Sampling preferentially took  
108 place when low tides (<90 cm) occurred close to midday. Surface samples (0.5 cm) were collected  
109 from different sediment types (muddy samples, sandy samples). The samples from each site were  
110 collected close to the water's edge (where the samples were only exposed to air for a short time,  
111 resulting in less water loss and less additional stress), divided into collection tubes for cold storage  
112 at -80 °C in the laboratory. Water temperature (Tem), dissolved oxygen air saturation (DO%),  
113 dissolved oxygen (DO), total dissolved solids (TDS), salinity (Sal), pH of the seawater adjacent to  
114 the sediment were measured *in situ* using a YSI water quality analyzer. Photosynthetically active  
115 radiation (PAR), chlorophyll (Chl), particulate inorganic carbon (calcite concentration, PIC),  
116 particulate organic carbon (POC) were extracted from MODIS-Aqua remote sensing data, and if the  
117 extracted values were NA, then extracted from 8-day average, monthly average, etc.

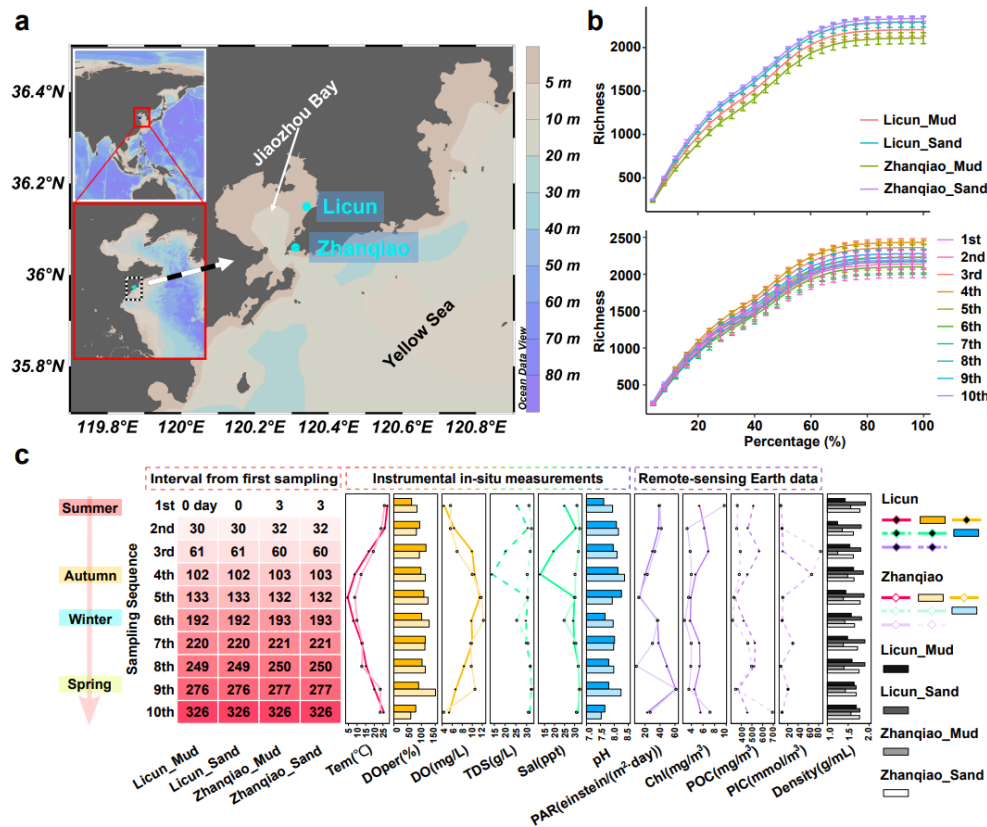

118

119 Fig. 1 Sampling design. a) Geographical information on the stations b) Richness dilution curve

120 c) Sampling time and variation of environmental factors (Tem: water temperature Doper: dissolved

121 oxygen air saturation DO: dissolved oxygen TDS: total dissolved solids Sal: salinity PAR:

122 photosynthetically active radiation PIC: particulate inorganic carbon POC: particulate organic

123 carbon).

124

## 125 2.2 High throughput sequencing

126 Samples for sequencing were collected each month, with the August (1<sup>st</sup> sample month),

127 November (4<sup>th</sup>), February (6<sup>th</sup>) and May (9<sup>th</sup>) being characteristic months of each local season; an

128 additional parallel sample was also sequenced. DNA was extracted from the genomic DNA of the

129 microbial community according to the instructions of the E.Z.N.A.® Soil DNA Kit (Omega Bio-

130 tek, Norcross, GA, USA). 1% agarose gel electrophoresis was used to check DNA quality and

131 NanoDrop 2000 (Thermo Scientific, USA) was used to determine DNA concentration and purity.  
132 PCR amplification of the V3-V4 variable region of the 16S rRNA gene was performed using  
133 upstream primer 338F (5'-ACTCCTACGGGAGGCAGCAG-3') and downstream primer 806R (5'-  
134 GGACTACHVGGGTWTCTAAT-3') with barcode sequences (Liu et al., 2016), the PCR reaction  
135 system was: 5×FastPfu buffer 4 µL, 2.5 mM dNTPs 2 µL, each primer (5 µM) 0.8 µL, Fast Pfu  
136 polymerase 0.4 µL, bovine serum albumin (BSA) 0.2 µL, template DNA 10 ng, and ddH<sub>2</sub>O to a  
137 final volume of 20 µL. Amplification procedure: initial denaturation at 95°C for 3 min, 27 cycles  
138 (denaturation at 95°C for 30 s, annealing at 55°C for 30 s, extension at 72°C for 45 s), followed by  
139 a single extension at 72°C for 10 min (ABI GeneAmp® 9700). Three replicates of each sample were  
140 run. PCR products from the same sample were mixed and recovered on a 2% agarose gel, purified  
141 using the AxyPrep DNA Gel Extraction Kit (Axygen Biosciences, Union City, CA, USA), quantified  
142 using a Quantus™ Fluorometer (Promega, USA) and libraries constructed. Sequencing was  
143 performed on the Illumina Miseq PE300 platform (Illumina, San Diego, USA) according to the  
144 standard protocol of Majorbio Bio-Pharm Technology Co. Ltd. (Shanghai, China).

145

### 146 2.3 Sequencing data processing

147 Quality control of the double-ended raw sequencing data was performed using fastp v0.19.6  
148 (Chen et al., 2018). Splicing was performed using FLASH v1.2.11 (Magoč and Salzberg, 2011): 1)  
149 truncate window bases for reads with an average quality score <20 within the 50 bp window of the  
150 tail, filter reads below 50 bp, and reads containing N bases were removed; 2) splice pairs of reads  
151 with a minimum overlap of 10 bp; 3) filter sequences with an overlap mismatch rate >0.2. Barcode  
152 and front-end primer sequences were removed. The data have been deposited in the Genome



153 Sequence Archive (Tingting Chen et al., 2021) in National Genomics Data Center, China National  
154 Center (CNCB-NGDC Members and Partners, 2022) for Bioinformation / Beijing Institute of  
155 Genomics, Chinese Academy of Sciences (GSA: CRA010554) that are publicly accessible at  
156 <https://ngdc.cnbc.ac.cn/gsa>.

157 Amplicon sequence variant (ASV) selection and feature table construction were performed  
158 using EasyAmplicon v1.14 (Liu et al., 2021): in the quality filter, a default value of 0.01 was used  
159 for “-fastq\_maxee\_rate”; in dereplication, a default value of 8 was used for “-miniuniquisize”; in  
160 denoising, “- minsize” was set to 20; in the feature table construction, the default statement was  
161 used; when removing plastids and non-bacteria, “- db” was set to rdp\_16s\_v18.fa, “- syntax\_cutoff”  
162 was set to 0.6; normalization by subsample was set to the minimum value by default.

163 Alpha diversity was analyzed using EasyAmplicon: box plots and dilution curves were plotted  
164 using the default statements; filtering by abundance used a default value of 0 for “-thre”, true for “-  
165 scale” and 100 for “-zoom”; the default statement was used to filter the results above an abundance  
166 threshold (0.1%). The Venn network was plotted using EVenn (Tong Chen et al., 2021).

167 Beta diversity and relative abundance at the phylum and class level were analyzed using  
168 EasyAmplicon: default statements generated bray\_curtis distance matrices, PCoA, CPCoA, and  
169 stackplot were plotted; in the treemap, “- topN” was set to 200; in the extended histogram, “-  
170 threshold” was set to the default value of 0.1, a default value of “t.test” was used for “--method”, a  
171 default value of 0.05 was used for the “--pvalue”, and “BH” was used for “--fdr”.

172 LEfSe analysis was performed using OECloud tools (<https://cloud.oebiotech.cn>), with 0.1%  
173 abundance screening, unassigned categories were not included in the analysis, for the interclass  
174 Kruskal-Wallis test, alpha = 0.05, LDA score threshold was 2.0.

175 FAPROTAX v1.2.4 (Louca et al., 2016) in ImageGP (Chen et al., 2022)  
176 (<http://www.ehbio.com/ImageGP/index.php/Home/Index/FAPROTAX.html>) was used to predict  
177 biogeochemical cycle functional genes and STAMP v2.1.3 (Parks et al., 2014) was used to analyse  
178 for significant differences between the two groups: Welch's t-test was used with a Storey FDR test  
179 correction. PICRUSt2 (Douglas et al., 2019) in the OECloud tools (<https://cloud.oebiotech.cn>) was  
180 used to predict the abundance of gene families. The volcano plot between the two groups was  
181 performed using EasyAmplicon and OmicStudio (Lyu et al., 2023) with "--threshold" set to 0, "--  
182 method" set to Wilcox, "--pvalue" set to the default value of 0.05 and "--fdr" set to 0.05. The top 25  
183 enriched/depleted relative abundances in the volcano plot were plotted on a heatmap (R package  
184 ComplexHeatmap v2.15.1) (Gu et al., 2016; Gu, 2022).

185 The R package igraph v1.3.2 (Csardi and Nepusz, 2006) was used to analyze the network  
186 modules, calculate the Pearson correlation coefficient between two ASVs (occurrence >80%),  
187 maintain a threshold of  $r > 0.7$  and  $p < 0.01$  and calculate the layout based on layout\_with\_fr. The 18  
188 modules with the highest number of nodes were colored.

189 Environmental factor analysis: ASVs (or KEGG orthologs) with station-wide frequencies  $\geq 100$   
190 were screened for Hellinger transformation to attenuate the effect of zero values. Environmental  
191 factor data were +1 and then natural log transformed to make the data more homogeneous. Using  
192 the R package vegan v2.6-2 (Oksanen, 2010) decorana() operations for axis lengths and vif.cca()  
193 for covariance analysis, 999 permutation tests were carried out on the constraint axis as a whole and  
194 on each axis separately (Bonferroni for p-value correction). ordistep()/ordiR2step() was used for  
195 forward selection and 999 permutation tests, varpart() was used for variance decomposition  
196 followed by 999 permutation tests to explain variance. bioenv() was used to calculate the most

197 relevant combination of environmental factors.

198 Random forest modelling was performed using the R package randomForest v4.7-1.1 with a  
199 default statement and with cross-validation to filter the number of features associated with temporal  
200 change (Liaw and Wiener, 2002; J. Zhang et al., 2018; Liu et al., 2021). The monthly affiliation of  
201 sediment samples was predicted based on the feature model, and a time-series prediction fit was  
202 plotted.

203

### 204 **3 Results**

#### 205 3.1 Sequence screening and ASV characterization table

206 After quality control of 56 amplicon samples, 2,606,341 sequences were retained and 296,193  
207 sequences were discarded. 6,723 good amplicons were obtained after redundancy and denoising.  
208 6,497 ASVs were obtained after removal of plasmids and non-bacteria ( $1,754,033/2,606,341 = 67.3\%$   
209 sequences mapped). Sample size was 15,325 after equal sampling and normalization.

210

#### 211 3.2 Alpha diversity

212 Dilution curves by time series and by station and substrate type each reached a plateau (Fig.  
213 1b). There were no significant differences in the Shannon indices between the monthly samples.  
214 The Shannon index for ZQ mud samples was significantly lower than that for ZQ sand samples  
215 (TukeyHSD,  $p = 0.001$ ) and significantly lower than that for LC sand samples ( $p = 0.036$ ) (Fig. 2b).  
216 There were 432 ASVs with a relative abundance  $>0.1\%$  by station and substrate type, with 152-181  
217 ASVs in each group. There were 284 ASVs that were unique to each group. There were 1,652 ASVs  
218 with abundances  $>0.1\%$  when counted by temporal variation, with the least variation between

219 samples collected from 5-7<sup>th</sup> (December, February and March) and the most variation within  
 220 samples collected from 8-10<sup>th</sup> (April, May and July).

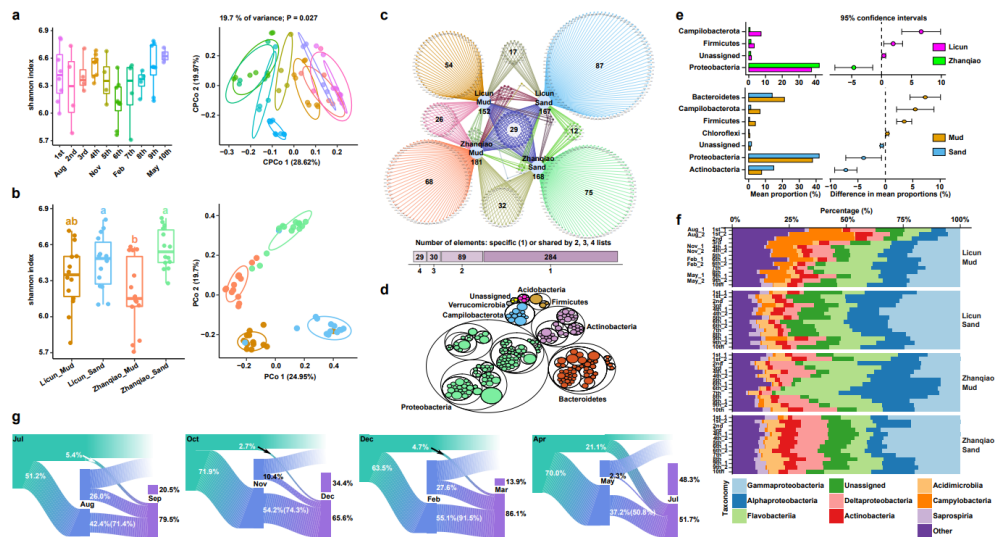

221  
 222 Fig. 2 Alpha/Beta diversity and relative abundance at major phylum and class levels. a)  
 223 Shannon index (TukeyHSD test) and CCoA of samples by month b) Shannon index (TukeyHSD  
 224 test) and PCoA (Bray\_Curtis) of samples from different stations and substrates c) Venn network  
 225 plots of bacterial ASVs (abundance >0.1%) between stations and substrate types d) Treemap of  
 226 relative abundance top200 ASVs e) Comparison of differences in phylum levels (abundance >0.1%)  
 227 between stations and between substrates (>0.5%, t.test, p <0.05) f) Relative abundance at major  
 228 class levels g) Sankey plots of changes in bacterial ASVs (>0.1%) by season, with transmission  
 229 rates of common ASVs in brackets.

230

### 231 3.3 Beta diversity and relative abundance at major phylum and class levels

232 CCoA analysis of samples from each month was significant at 19.7% resolution (p <0.05)  
 233 and was best separated on CCoA axis 1. PCoA analyses separated samples from different stations  
 234 and substrates (p <0.05). Most of the top200 ASVs by relative abundance belonged to  
 235 Proteobacteria, Bacteroidetes and Actinobacteria. The relative abundance of Campilobacterota and

236 Firmicutes was significantly higher at LC, while Proteobacteria was significantly higher at ZQ.  
 237 Bacteroidetes, Campilobacterota, Firmicutes and Chloroflexi were significantly more abundant in  
 238 the muddy samples, while Actinobacteria and Proteobacteria were significantly more abundant in  
 239 the sandy samples. The composition at the class level varied between stations and substrates,  
 240 although Gammaproteobacteria, Alphaproteobacteria, Flavobacteriia were most abundant with the  
 241 sum of their relative abundances accounting for about 50% (Fig. 2).

242

### 243 3.4 Linear Discriminant Analysis Effect Size (LEfSe) analysis

244 In the LEfSe of the monthly samples, Verrucomicrobia was the biomarker for the February  
 245 sample, Bacilli and Verrucomicrobiae for February, Alphaproteobacteria for March, Bacteroidia  
 246 for August and Cytophagia for October. Among the different stations and substrates, Acidobacteria  
 247 and Bacteroidetes were biomarkers for the ZQ mud samples, Actinobacteria for ZQ sand,  
 248 Campilobacterota and Firmicutes for LC mud, and Proteobacteria for LC sand (Fig. 3).

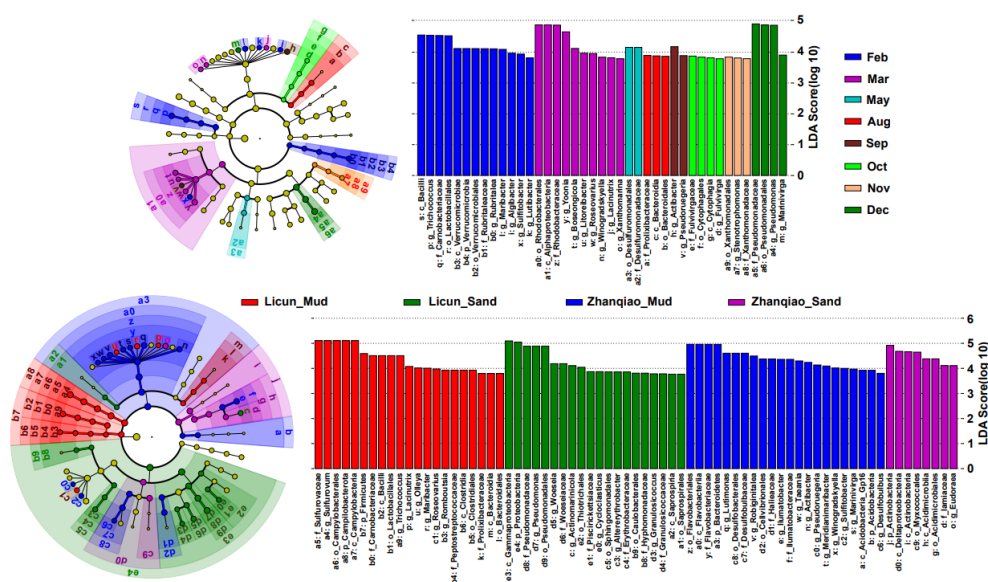

249

250 Fig. 3 Time series and station/substrate LEfSe analysis. Dot diameters represent relative  
 251 abundance (>0.1%, unassigned categories are not included in the analysis), no significant

252 differences are yellow, Kruskal-Wallis tests for significant differences between classes ( $p < 0.05$ ) are  
 253 assigned colors, LDA score threshold 2.0.

254

### 255 3.5 Comparison of gene function

256 Chemoheterotrophy function was high at both stations ( $>30\%$  in all), with significantly higher  
 257 abundance at LC (34.6%, Welch's t-test,  $p = 0.024$ ). Respiration of sulfur compounds (11.4%) and  
 258 sulfate respiration (11.2%) were also significantly higher at ZQ ( $p < 0.001$ ). The relative abundance  
 259 of aerobic chemoheterotrophy was different between substrates, with sandy samples being highly  
 260 significantly higher (29.7%,  $p = 0.0002$ ). Fermentation abundance was significantly higher in mud  
 261 samples (9.9%,  $p < 0.001$ ) (Fig. 4).

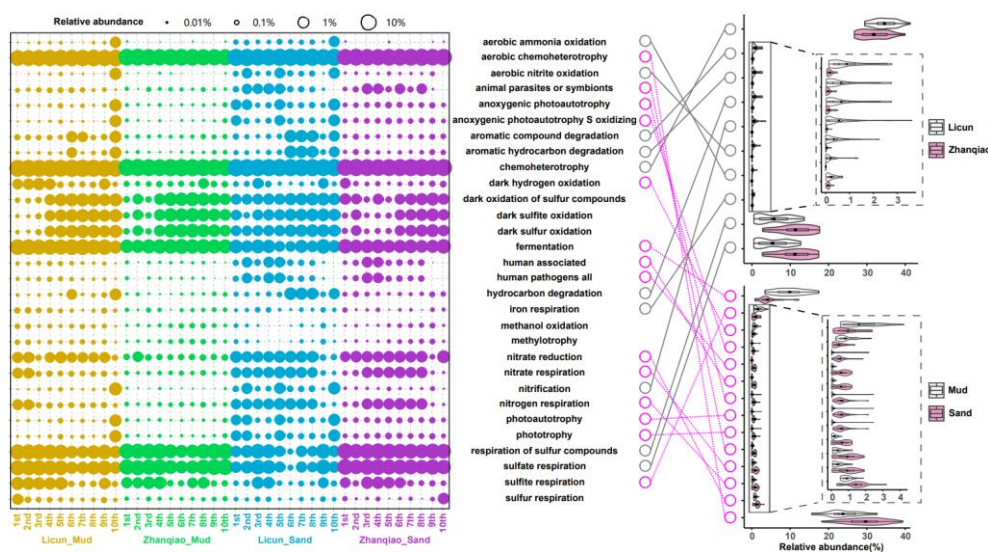

262

263 Fig. 4 Relative abundance of elemental cycling functions (abundance  $>0.1\%$ ) and comparison

264 of differences between stations and between substrates (abundance  $>0.2\%$ , Welch's t-test,  $p <$

265  $0.05$ ).

266

267 Among gene families, the relative abundance of those associated with lipid metabolism,

268 terpenoid metabolism and polyketides was  $>0.5\%$  and significantly higher at ZQ than at LC.

269 Between substrates, there were more significantly different KEGG\_L2 (Kyoto Encyclopedia of  
 270 Genes and Genomes, 16 categories with abundance >0.5%) involving metabolism, environmental  
 271 information processing, cellular processes, organismal systems and human diseases. Most  
 272 KEGG\_L3 (90.2%) were not significantly different between stations, whereas 56.1% were  
 273 significantly different between substrates (Fig. S3). KEGG orthologs (KO) was also mostly (81.7%)  
 274 not significantly different between stations, although 64.5% were significantly different between  
 275 substrates (Fig. 5).

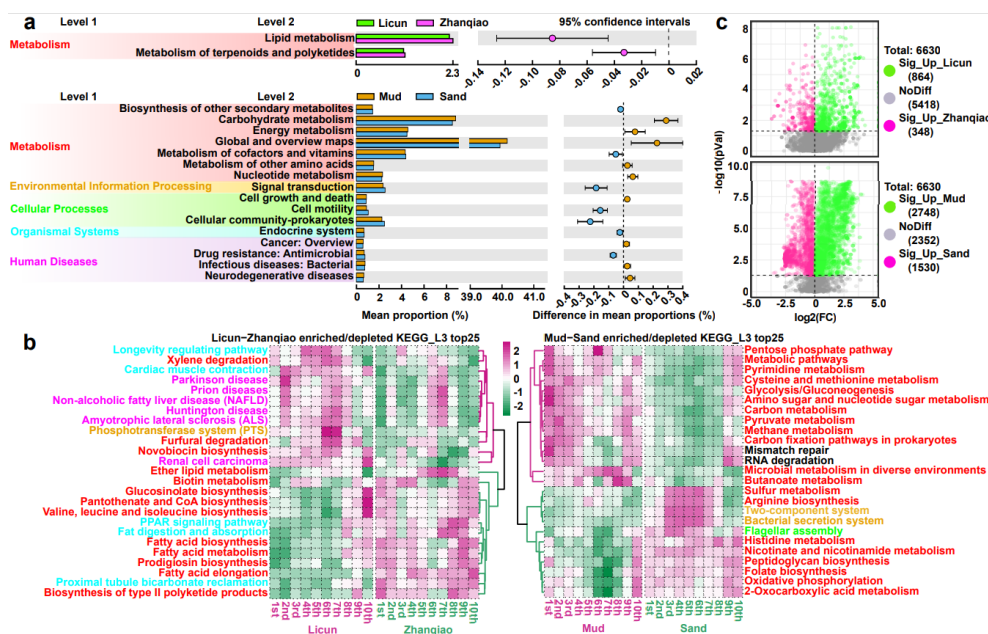

276  
 277 Fig. 5 Gene family prediction. a) Comparison of KEGG differences between stations and  
 278 substrates (abundance >0.5%, Welch's t.test, adj <0.05) b) Relative abundance of major  
 279 enriched/depleted KEGG\_L3 between stations and substrates (top25, category names colored as in  
 280 Fig. 5a KEGG\_L1 ) c) KO volcano analysis across stations and substrates.

281

### 282 3.6 Comparison of network modularity

283 The average edge number of nodes with significant correlations in summer, autumn, winter

284 and spring were 12.3, 11.8, 16.6 and 21.9. Within stations, sandy samples have a higher number of

285 nodes and a higher average connectivity degree than muddy samples (LC - muddy 8.6, sandy 11.4,  
286 ZQ - muddy 7.2, sandy 14.2) (Fig. 6).

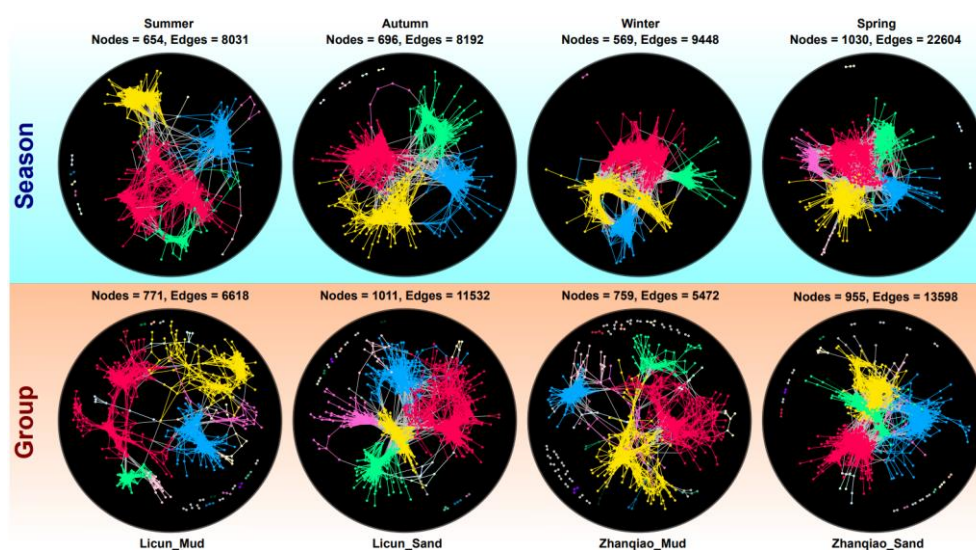

287  
288 Fig. 6 Network module analysis. The top row shows the network modules of different seasons;  
289 the bottom row shows the network modules of different stations and substrates. The Pearson  
290 correlation coefficient ( $r > 0.7$  and  $p < 0.01$ ) was calculated between two ASVs with an occurrence  
291 rate  $> 80\%$ . The layout was calculated based on layout\_with\_fr. In each network diagram, the top 18  
292 modules are given a different color.

293

### 294 3.7 Analysis of environmental factors

295 PIC + pH + DO% + PAR + Sal + Tem + POC + Chl were forward selected in this order. The  
296 total variance explained by PIC/pH/PAR was significant ( $p < 0.05$ ). The most relevant combination  
297 of environmental factors was PIC for size 1 (correlation 0.3154). On the RDA1 axis, there was a  
298 tendency for samples to be separated by season (Fig. 7).

299 PIC + pH + Chl + POC passed forward selection in order and the total variance explained by  
300 PIC/Chl was significant ( $p < 0.01$ ). The most relevant environmental factor combination was Chl +  
301 PIC for size 2 (correlation 0.3103), followed by Chl + PIC + POC for size 3 (0.2870) and Chl for



302 size 1 (0.2694). There was less variation between samples compared to the results of the ASV

303 redundancy analysis (Fig. 7).

304

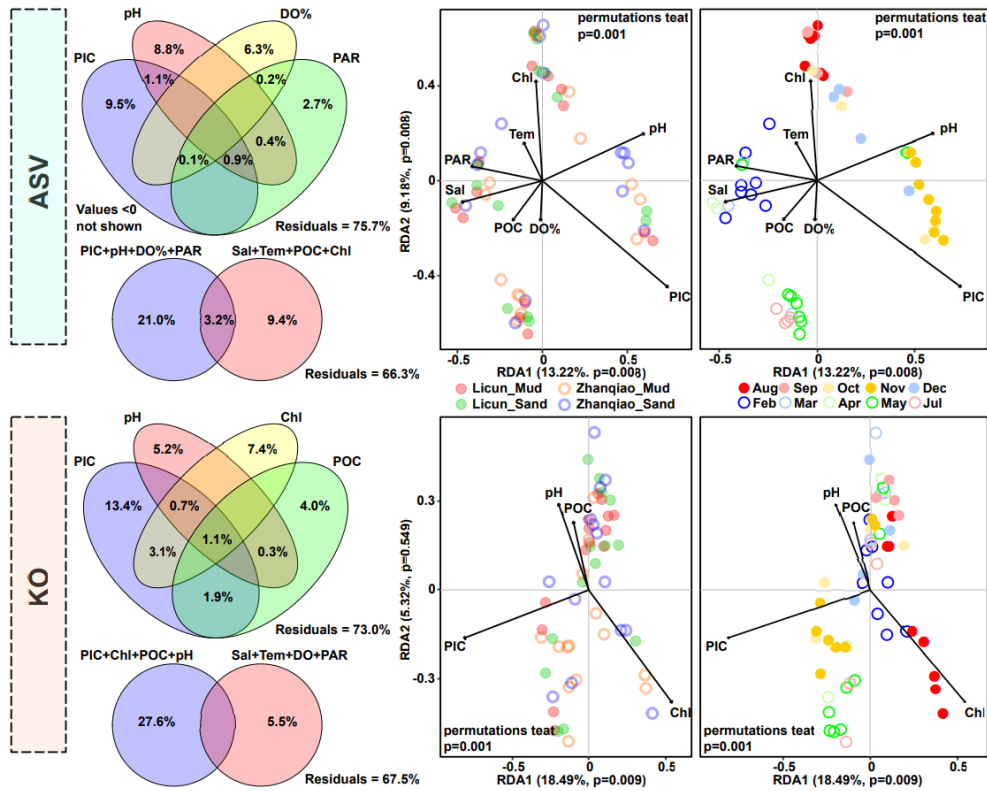

305

306 Fig. 7 Environmental factor analysis. Individual and combined variance decomposition of the

307 best four factors in forward selection, parsimonious model after forward selection showing the first

308 two axes of the RDA (type II scale, double ordinate plot, sample coordinates calculated using species

309 weights). Tem: water temperature DO%: dissolved oxygen air saturation Sal: salinity PAR:

310 photosynthetically active radiation PIC: particulate inorganic carbon POC: particulate organic

311 carbon.

312

313 3.8 Random forest prediction

314 Cross-validation yielded 43 family-level features that were the better combinations, with the

315 Proteobacteria of spongiibacteraceae, porticoccaceae, granulococcaceae, alcaligenaceae,

316 nannocystaceae and methylophilaceae having the highest importance (%IncMSE) (Fig. S5).

317

## 318 **4 Discussion**

### 319 4.1 Relationship between intertidal sediment biofilms by station and substrate factors

320 The Shannon index did not differ significantly between stations, but was less variable and  
321 significantly higher in sandy samples than in muddy samples (Fig. S1). A comparison of network  
322 modularity also showed that the correlations between the ASVs were tighter and that there were  
323 more ASVs involved in community assembly in sandy samples than in mud (Fig. 6). Network  
324 complexity and connectivity are often positively correlated with environmental heterogeneity and  
325 microbial communities in heterogeneous environments are more likely to aggregate and form  
326 cooperative networks to share resources and transfer information (Mougi and Kondoh, 2012;  
327 Morriën et al., 2017; Lu et al., 2022). It is hypothesized here that differences in current strength and  
328 runoff within and outside the bay may have had a stronger effect on permeable sandy sediments,  
329 with increased heterogeneity promoting bacterial aggregation to adapt to the environment.

330 Of the highly abundant bacteria in each station/substrate type, ASVs unique to each group  
331 accounted for 35.5-52.1% of the groups, indicating variability in the composition of high abundance  
332 bacteria in each sample group, even between samples of different substrates sampled in close  
333 proximity within stations. Bacterial diversity has been found to differ between fine- and coarse-  
334 grained sediments (Lai et al., 2023). Differences in sediment grain structure can also lead to changes  
335 in bacterial community structure (van de Kamp et al., 2019). The abundance of nitrification-  
336 associated bacteria fluctuates more in intertidal sandy sediments than in mud (Fernandes et al.,  
337 2016). Sediment grain size has a significant effect on the community structure of *nirS*-type

338 denitrifying bacteria (Chen et al., 2020). Therefore, sediments of different grain sizes have the  
339 ability to shape their own specific bacterial communities.

340 Proteobacteria were the most abundant group in this study, accounting for about 50% (Fig. S2).  
341 They were slightly less abundant in LC mud samples (especially in summer, when Campilobacterota  
342 appeared in high abundance, increasing from an average of 1.2% to 14.6-34.1%). Proteobacteria are  
343 widely distributed, have high metabolic, cooperative and biofilm-forming capacities, and are also  
344 adapted to high metal loads (Regnell and Watras, 2019; Zhuang et al., 2019; Hillyer et al., 2023).  
345 Proteobacteria have been detected in high abundance in estuarine intertidal sediments (37.5%) (Yi  
346 et al., 2020), coral reef sediments (65%) (Alvarez-Yela et al., 2019), mangrove surface sediments  
347 (>40%) (Huergo et al., 2018; Fiard et al., 2022), polar surface sediments (44-68%) (Thomas et al.,  
348 2020; Chaudhary et al., 2022), and marine sediments exposed to oil transport activities (45-77%)  
349 (Oyetibo et al., 2021). Campilobacterota has been observed at higher abundances (>5%) in  
350 thermogenic hydrocarbon seep sediments (Li et al., 2023) and is involved in mediating oxidation of  
351 sulfur, sulfide or sulphate in intertidal sediments (7.90-22.15%) (Carrier et al., 2020; Fang et al.,  
352 2022). The genus *Arcobacter* has been found to increase in abundance in anoxic surface sediments,  
353 and in addition, is highly responsive to oxygenation events (Broman et al., 2017; Mori et al., 2021).  
354 Therefore, it is likely that hydrocarbon, sulfide and oxygen (low summer oxygen, low mud  
355 permeability and low circulation rates within the bay) are responsible for the increased abundance  
356 of Campilobacterota in summer mud samples at LC.

357 There are corresponding phylum-level biomarkers in different stations and substrates. All  
358 taxonomic levels of Firmicutes and Campilobacterotas were biomarkers in LC mud samples,  
359 Firmicutes is one of the major groups in natural biofilms (Guo et al., 2017; Liang et al., 2019) and

360 is abundant in polyethylene microplastic biofilms, and may provide potential hosts for antibiotic  
361 resistance genes (Wu et al., 2017; Guo et al., 2020). Firmicutes is also highly abundant in  
362 environments under severe stress, such as in deep-sea sediments (9.5%) (Goffredi and Orphan, 2010;  
363 Franco et al., 2020), shallow hypoxic zone sediments (Bhattacharya et al., 2021), and anaerobic  
364 bioreactors (involved in hydrolysis and fermentation) (Narihiro et al., 2015; Fontana et al., 2016;  
365 Luo et al., 2016). The abundance of all taxonomic levels of Acidobacteria increased in ZQ mud  
366 samples and most were also increased in ZQ sand samples. Acidobacteria are low-nutrient bacteria  
367 (Fierer et al., 2007) that have been found to be adapted to polar environments (Pearce et al., 2013;  
368 Gugliandolo et al., 2016) and are key microorganisms (~8%) in mangrove sediments (Huergo et al.,  
369 2018; Tavares et al., 2021; Fiard et al., 2022). Actinobacteria is one of the major bacterial groups in  
370 estuarine surface sediments and is significantly and positively correlated with denitrification rates  
371 (Wei et al., 2015; Li et al., 2022). Uncultured Actinobacteria OPB41 has been shown to be adapted  
372 to deep-sea sediment environments, where it can catabolize sugars and be metabolically active  
373 (Zinke et al., 2017; Bird et al., 2019). In summary, there were significant differences in the  
374 abundance patterns of the more diverse bacterial taxa and functions between the different stations  
375 and substrates, shaping their own specific bacterial communities.

376 Chemoheterotrophy function occurred in 77.8% (900 of 1,157 ASVs) and aerobic  
377 chemoheterotrophy function occurred in 58.5%. One study has found that the abundance of  
378 chemoheterotrophy and aerobic chemoheterotrophy in surface sediments may account for up to  
379 half of the total abundance, giving bacteria a strong ability to degrade organic matter and obtain  
380 energy from the oxidation of organic compounds (X. Zhang et al., 2018; Hou et al., 2021).  
381 Chemoheterotrophy and aerobic chemoheterotrophy account for more than 50% of the bacteria

382 and probably point to a stronger tendency for organic matter degradation in LC or sandy  
383 sediments. Sulfur compounds respiration function occurred in 26.4% (306 of 1,157 ASVs) and  
384 sulfate respiration function occurred in 24.4% (282 of 1,157 ASVs). Sulfur compounds respiration  
385 may be associated with adaptation to hypoxia by promoting respiration using sulfides as electron  
386 acceptors (Deng et al., 2019). Sulfate respiration may play a major role in the biodegradation of  
387 sulfate-dependent aromatic compounds (Zhuang et al., 2019). Fermentation function occurred in  
388 22.0% (255 of 1,157 ASVs). It has been found that microorganisms in intertidal and subtidal  
389 sandy sediments often switch between oxic and anoxic states, favouring facultative anaerobic  
390 fermenters where fermentation is dominated by anoxic carbon mineralization (which also  
391 promotes H<sub>2</sub> production), in contrast to muddy sediments where it is largely unrelated to anaerobic  
392 respiration (Precht et al., 2004; Kessler et al., 2013; Saad et al., 2017; Kessler et al., 2019).  
393 Fermentation also promotes the cycling of other material, such as in organic matter-rich and  
394 sulfate-rich environments, where enhanced fermentation may lead to increased microbial  
395 reduction of sulfate (Sun et al., 2020). The abundant biogeochemical cycling functions differ  
396 significantly between stations and substrates, with stations mostly differing significantly in  
397 chemoheterotrophy, sulphur, nitrogen, iron, aromatics and hydrocarbon metabolism, whereas  
398 substrates differ in aerobic chemoheterotrophy, fermentation, dark hydrogen oxidation, animal-  
399 related, photosynthesis-related and sulphite metabolism, suggesting that both station and substrate  
400 factors are likely to be differentially involved in biogeochemical cycling processes between  
401 samples.

402       There were significantly fewer categories of significant differences between stations than  
403 between substrates in KEGG\_L2, suggesting that differences in gene functions were more due to

404 substrate differences than to differences in location within and outside the bay. Between stations,  
405 the enriched/depleted KEGG\_L3 top25 involved more organismal systems and human diseases (Fig.  
406 5b), with all human disease categories enriched at LC, suggesting that the poor circulation in the  
407 bay was not conducive to effective dispersal of land-based sources of domestic sewage, etc. Between  
408 the substrates, the top 25 gene functions were mostly related to metabolism. Significant differences  
409 in KO PCoA were found between LC substrates and between muddy samples (Fig. S4). ZQ current  
410 velocities subjected the sediments to strong scouring, which promoted similar bacterial gene family  
411 succession for both muddy and sandy samples. The low current velocities in the bay may have been  
412 sufficient to influence bacterial succession in the more permeable sandy sediments, so that there  
413 were no gene family differences between stations for the sandy samples. In contrast, the sediment  
414 environment had less influence on gene families than on ASVs, possibly indicating that the bacterial  
415 community was evolving but the core gene functions adapted to the environment were relatively  
416 stable.

417

#### 418 4.2 Temporal changes in intertidal sediment biofilms

419 Temporal changes in bacterial community structure varies between intertidal and supratidal  
420 environments in different areas, with some showing no significant changes and others showing  
421 significant shifts (Taylor and Kurtz, 2020). Seasonal changes in bacterial communities are  
422 sometimes not as large as spatial changes, when seasonal changes are only apparent in individual  
423 taxa (Dini-Andreote et al., 2014; Tebbe et al., 2022). In contrast, bacterioplankton in the Chesapeake  
424 Bay have a repeating annual pattern, with strong temporal variation in bacterial communities even  
425 overwhelming spatial patterns (Wang et al., 2020). In other estuarine and coastal waters, temporal

426 variation also strongly influences changes in bacterial abundance (Lindh et al., 2015; Bunse and  
427 Pinhassi, 2017; Thomson et al., 2022). Bacterioplankton in estuarine wetlands have a high diversity  
428 index in summer, and DO and pH strongly influence these communities (Li et al., 2020). In another  
429 study of mangrove and tidal wetland sediments, bacterial diversity indices were also higher in  
430 summer (Zhou et al., 2017). Dry-rainy season variation was the dominant factor influencing these  
431 communities, with temporal and spatial patterns more pronounced in water column bacterial  
432 communities than in sediments (Kaestli et al., 2017). In another study, intertidal sediment bacteria  
433 were significantly separated in PCoA when grouped by wet and dry seasons (Yi et al., 2020). There  
434 is also indirect evidence for the influence of temporal variation on bacterial communities: acyl-  
435 homoserine lactones (AHLs), which are key bacterial signals within biofilms that are degraded by  
436 pH- and temperature-dependent hydrolysis, vary seasonally in concentration, being higher in winter  
437 and lower in summer (Roggatz and Parsons, 2022). The intertidal filter-feeding clam (*Ruditapes*  
438 *philippinarum*) is closely related to the microorganisms in its environment, and its extrapallial fluids  
439 show strong temporal variation in bacterial alpha-diversity between months (Offret et al., 2023).

440       Of the most abundant bacteria, the least variation over time was seen in winter and the greatest  
441 variation in spring (Fig. 2g). Samples collected from April to July were also the most distinct from  
442 each other in the CPCoA. In the network modularity comparison, winter and spring samples were  
443 more closely correlated than summer and autumn ASVs, with the lowest number of nodes in winter  
444 (569) and the highest in spring (1,030) (Fig. 6). Based on the projection of samples on environmental  
445 factors by month in the RDA, it is clear that spring samples (April to July samples) were most  
446 positively influenced by POC, DO%, PIC and Sal (and most negatively influenced by Tem/Chl/PH),  
447 summer samples (August and September samples) were positively influenced by Chl/Tem (and

448 negatively influenced by PIC/DO%/POC), autumn samples (October to December samples) were  
449 positively influenced by pH/PIC (and negatively influenced by Sal/PAR) and winter samples  
450 (February and March samples) were positively influenced by PAR/Sal (and negatively influenced  
451 by pH) (Fig. 7). The spring season was affected by a combination of more environmental factors  
452 and the abundant bacteria correlated with each environmental factor varied. The network diagram  
453 suggests that the most species were involved in community building in spring, so there was a  
454 tendency for greater species variation with environmental changes, whereas in winter the bacteria  
455 were more closely related, but had the least number of community building species, so the tendency  
456 for variation might be minimal.

457 Monthly samples generally had their own biomarkers at the order level: August - Bacteroidales,  
458 October - Cytophagales, November - Xanthomonadales, December - Pseudomonadales, February -  
459 Verrucomicrobiales and Lactobacillales, March - Rhodobacterales, and May - Desulfuromonadales.  
460 It can be seen that the temporal change had a strong influence in shaping the intertidal bacterial  
461 community in the temperate Jiaozhou Bay, and there was a tendency for taxonomic abundance at  
462 the order level to change from month to month. The pattern of change in abundance of the better  
463 combination in the random forest prediction responded better to changes in temporal change ( $\rho >$   
464  $0.7$ ,  $p < 0.001$ ,  $R^2 > 0.6$ ), reflecting the effect of temporal change on bacterial communities from the  
465 other side.

466 The trend of seasonal separation of ASV in the RDA analysis was reduced in the KO analysis.  
467 Similar results were also found for CPCoA (Fig. S4). It has previously been reported that when there  
468 were seasonal changes in the bacterial community structure in the Monterey Bay upwelling zone,  
469 there was a consistent seasonal trend in the gene abundance of key metabolic pathways (Reji et al.,



470 2020). Bacterial communities in surface waters of Kuwait Bay and nearby coastal waters showed  
471 significant seasonal separation, while PICRUSt functional predictions showed partial seasonality  
472 (Ismail and Almutairi, 2022). Thus, temporal change had a major influence in the Qingdao intertidal  
473 bacterial community, but seems to have had less influence in shaping the gene family of the  
474 community.

475

## 476 **5 Conclusion**

477 The analyses presented here show that sandy intertidal sediments have more bacterial species  
478 involved in community building than muddy sediments. Greater current strengths over the  
479 permeable sandy sediments and high environmental stress increased heterogeneity, which in turn  
480 promoted bacterial community aggregation and their ability to adapt to the environment. There was  
481 a significant separation between substrate types in the PCo 1 axis and between stations in the PCo  
482 2 axis. Different substrate types at the different stations had their own phylum-level biomarkers and  
483 bacterial functional enrichment status, with substrate factors having a greater influence. Notably,  
484 many gene families associated with human disease were enriched at LC, suggesting that the low  
485 circulation rates in the bay were unable to remove contamination from the sources of domestic  
486 wastewater. The sediment environment had less influence on KO than on ASV, and it is possible  
487 that bacterial species are constantly evolving, but the function of genes adapted to the environment  
488 is relatively stable. Temporal changes had a stronger shaping effect on the composition of bacterial  
489 species than on gene families. These results will provide the necessary empirical support for  
490 ecological conservation in temperate intertidal sediments.

491

492 **Author contributions**

493 **Xuechao Chen, Xinran Zhang, Hao Yu:** Methodology, Software, Validation, Formal  
494 analysis, Investigation, Project administration, Visualization, Writing - original draft.

495 **Meiaoxue Han, Jianhua Sun , Gang Liu:** Software, Investigation, Writing - review  
496 and editing. **Yan Ji , Chuan Zhai , Liyan Zhu:** Writing - review and editing. **Hongbing**

497 **Shao:** Resources, Supervision. **Min Wang, Andrew McMinn, Yantao Liang:**  
498 Conceptualization, Resources, Funding acquisition, Supervision, Writing - review and  
499 editing.

500

501 **Declaration of interests**

502 The authors declare that they have no known competing financial interests or personal  
503 relationships that could have appeared to influence the work reported in this paper.

504

505 **Acknowledgements**

506 We are grateful for the use of the high-performance server at the Center for High Performance  
507 Computing and System Simulation, Pilot National Laboratory for Marine Science and Technology  
508 (Qingdao, China). We appreciate the computational resources provided by IEMB-1, a high-  
509 performance computing cluster operated by the Institute of Evolution and Marine Biodiversity, and  
510 the Marine Big Data Center of the Institute for Advanced Ocean Study of Ocean University of China.  
511 The data were also analyzed on the free online platform of Majorbio I-Sanger Cloud Platform  
512 ([www.i-sanger.com](http://www.i-sanger.com)) and OECloud tools (<https://cloud.oebiotech.cn>).

513 This work was supported by the Laoshan Laboratory (No. LSKJ202203201), National Key

514 Research and Development Program of China (2022YFC2807500), Natural Science Foundation of  
515 China (No. 42120104006, 41976117 and 42176111) and the Fundamental Research Funds for the  
516 Central Universities (202172002, 201812002, 202072001 and Andrew McMinn).

517

## 518 References

- 519 Alvarez-Yela, A.C., Mosquera-Rendón, J., Noreña-P, A., Cristancho, M., López-Alvarez, D., 2019. Microbial  
520 diversity exploration of marine hosts at Serrana Bank, a coral atoll of the Seaflower Biosphere Reserve. *Front. Mar.*  
521 *Sci.* 6, 338. <https://doi.org/10.3389/fmars.2019.00338>
- 522 Avila-Jimenez, M.-L., Burns, G., He, Z., Zhou, J., Hodson, A., Avila-Jimenez, J.-L., Pearce, D., 2020. Functional  
523 associations and resilience in microbial communities. *Microorganisms* 8, 951.  
524 <https://doi.org/10.3390/microorganisms8060951>
- 525 Bhattacharya, S., Mapder, T., Fernandes, S., Roy, C., Sarkar, J., Rameez, M.J., Mandal, S., Sar, A., Chakraborty,  
526 A.K., Mondal, N., Chatterjee, S., Dam, B., Peketi, A., Chakraborty, R., Mazumdar, A., Ghosh, W., 2021.  
527 Sedimentation rate and organic matter dynamics shape microbiomes across a continental margin. *Biogeosciences* 18,  
528 5203–5222. <https://doi.org/10.5194/bg-18-5203-2021>
- 529 Bird, J.T., Tague, E.D., Zinke, L., Schmidt, J.M., Steen, A.D., Reese, B., Marshall, I.P.G., Webster, G., Weightman,  
530 A., Castro, H.F., Campagna, S.R., Lloyd, K.G., 2019. Uncultured microbial phyla suggest mechanisms for multi-  
531 thousand-year subsistence in Baltic Sea sediments. *mBio* 10, e02376-18. <https://doi.org/10.1128/mBio.02376-18>
- 532 Broman, E., Sachpazidou, V., Pinhassi, J., Dopson, M., 2017. Oxygenation of hypoxic coastal Baltic Sea sediments  
533 impacts on chemistry, microbial community composition, and metabolism. *Front. Microbiol.* 8, 2453.  
534 <https://doi.org/10.3389/fmicb.2017.02453>
- 535 Bunse, C., Pinhassi, J., 2017. Marine bacterioplankton seasonal succession dynamics. *Trends Microbiol.* 25, 494–  
536 505. <https://doi.org/10.1016/j.tim.2016.12.013>
- 537 Carrier, V., Svenning, M.M., Gründger, F., Niemann, H., Dessandier, P.-A., Panieri, G., Kalenitchenko, D., 2020.  
538 The impact of methane on microbial communities at marine arctic gas hydrate bearing sediment. *Front. Microbiol.*  
539 11, 1932. <https://doi.org/10.3389/fmicb.2020.01932>
- 540 Chaudhary, D.K., Karki, H.P., Bajagain, R., Kim, H., Rhee, T.S., Hong, J.K., Han, S., Choi, Y.-G., Hong, Y., 2022.  
541 Mercury and other trace elements distribution and profiling of microbial community in the surface sediments of East  
542 Siberian Sea. *Mar. Pollut. Bull.* 185, 114319. <https://doi.org/10.1016/j.marpolbul.2022.114319>
- 543 Chen, Q., Fan, J., Ming, H., Su, J., Wang, Y., Wang, B., 2020. Effects of environmental factors on denitrifying  
544 bacteria and functional genes in sediments of Bohai Sea, China. *Mar. Pollut. Bull.* 160, 111621.  
545 <https://doi.org/10.1016/j.marpolbul.2020.111621>
- 546 Chen, S., Zhou, Y., Chen, Y., Gu, J., 2018. fastp: an ultra-fast all-in-one FASTQ preprocessor. *Bioinformatics* 34,  
547 i884–i890. <https://doi.org/10.1093/bioinformatics/bty560>
- 548 Chen, Tingting, Chen, X., Zhang, S., Zhu, J., Tang, B., Wang, A., Dong, L., Zhang, Zhewen, Yu, C., Sun, Yanling,  
549 Chi, L., Chen, H., Zhai, S., Sun, Yubin, Lan, L., Zhang, X., Xiao, J., Bao, Y., Wang, Y., Zhang, Zhang, Zhao, W.,  
550 2021. The Genome Sequence Archive Family: Toward Explosive Data Growth and Diverse Data Types. *Genomics*  
551 *Proteomics Bioinformatics* 19, 578–583. <https://doi.org/10.1016/j.gpb.2021.08.001>
- 552 Chen, T., Liu, Y., Huang, L., 2022. ImageGP: An easy-to-use data visualization web server for scientific researchers.

- 553 iMeta 1. <https://doi.org/10.1002/imt2.5>
- 554 Chen, Tong, Zhang, H., Liu, Y., Liu, Y.-X., Huang, L., 2021. EVenN: Easy to create repeatable and editable Venn  
555 diagrams and Venn networks online. *J. Genet. Genomics* 48, 863–866. <https://doi.org/10.1016/j.jgg.2021.07.007>
- 556 CNCB-NGDC Members and Partners, 2022. Database resources of the national genomics data center, china national  
557 center for bioinformation in 2022. *Nucleic Acids Res.* 50, D27–D38. <https://doi.org/10.1093/nar/gkab951>
- 558 Csardi, G., Nepusz, T., 2006. The igraph software package for complex network research. *InterJournal Complex*  
559 *Syst.* 1695, 1–9.
- 560 Dai, J., Song, J., Li, X., Yuan, H., Li, N., Zheng, G., 2007. Environmental changes reflected by sedimentary  
561 geochemistry in recent hundred years of Jiaozhou Bay, North China. *Environ. Pollut.* 145, 656–667.  
562 <https://doi.org/10.1016/j.envpol.2006.10.005>
- 563 Dang, H., Lovell, C.R., 2016. Microbial surface colonization and biofilm development in marine environments.  
564 *Microbiol. Mol. Biol. Rev.* 80, 91–138. <https://doi.org/10.1128/MMBR.00037-15>
- 565 Deng, J., Auchtung, J.M., Konstantinidis, K.T., Brettar, I., Höfle, M.G., Tiedje, J.M., 2019. Genomic variations  
566 underlying speciation and niche specialization of *Shewanella baltica*. *mSystems* 4, e00560-19.  
567 <https://doi.org/10.1128/mSystems.00560-19>
- 568 Dini-Andreote, F., de Cássia Pereira e Silva, M., Triadó-Margarit, X., Casamayor, E.O., van Elsas, J.D., Salles, J.F.,  
569 2014. Dynamics of bacterial community succession in a salt marsh chronosequence: evidences for temporal niche  
570 partitioning. *ISME J.* 8, 1989–2001. <https://doi.org/10.1038/ismej.2014.54>
- 571 Douglas, G.M., Maffei, V.J., Zaneveld, J., Yurgel, S.N., Brown, J.R., Taylor, C.M., Huttenhower, C., Langille, M.G.I.,  
572 2019. PICRUSt2: An improved and customizable approach for metagenome inference (preprint). *Bioinformatics*.  
573 <https://doi.org/10.1101/672295>
- 574 Duarte, B., Freitas, J., Caçador, I., 2012. Sediment microbial activities and physic-chemistry as progress indicators  
575 of salt marsh restoration processes. *Ecol. Indic.* 19, 231–239. <https://doi.org/10.1016/j.ecolind.2011.07.014>
- 576 Fang, J., Jiang, W., Meng, S., He, W., Wang, G., Guo, E., Yan, Y., 2022. Polychaete bioturbation alters the taxonomic  
577 structure, co-occurrence network, and functional groups of bacterial communities in the intertidal flat. *Microb. Ecol.*  
578 <https://doi.org/10.1007/s00248-022-02036-2>
- 579 Fernandes, S.O., Javanaud, C., Michotey, V.D., Guasco, S., Anschutz, P., Bonin, P., 2016. Coupling of bacterial  
580 nitrification with denitrification and anammox supports N removal in intertidal sediments (Arcachon Bay, France).  
581 *Estuar. Coast. Shelf Sci.* 179, 39–50. <https://doi.org/10.1016/j.ecss.2015.10.009>
- 582 Fiard, M., Cuny, P., Sylvi, L., Hubas, C., Jézéquel, R., Lamy, D., Walcker, R., El Houssainy, A., Heimbürger-Boavida,  
583 L.-E., Robinet, T., Bihannic, I., Gilbert, F., Michaud, E., Dirberg, G., Milton, C., 2022. Mangrove microbiota along  
584 the urban-to-rural gradient of the Cayenne estuary (French Guiana, South America): Drivers and potential  
585 bioindicators. *Sci. Total Environ.* 807, 150667. <https://doi.org/10.1016/j.scitotenv.2021.150667>
- 586 Fierer, N., Bradford, M.A., Jackson, R.B., 2007. Toward an ecological classification of soil bacteria. *Ecology* 88,  
587 1354–1364. <https://doi.org/10.1890/05-1839>
- 588 Fontana, A., Patrone, V., Puglisi, E., Morelli, L., Bassi, D., Garuti, M., Rossi, L., Cappa, F., 2016. Effects of  
589 geographic area, feedstock, temperature, and operating time on microbial communities of six full-scale biogas plants.  
590 *Bioresour. Technol.* 218, 980–990. <https://doi.org/10.1016/j.biortech.2016.07.058>
- 591 Franco, N.R., Giraldo, M.Á., López-Alvarez, D., Gallo-Franco, J.J., Dueñas, L.F., Puentes, V., Castillo, A., 2020.  
592 Bacterial composition and diversity in deep-sea sediments from the Southern Colombian Caribbean Sea. *Diversity*  
593 13, 10. <https://doi.org/10.3390/d13010010>
- 594 Ge, Y., Lou, Y., Xu, M., Wu, C., Meng, J., Shi, L., Xia, F., Xu, Y., 2021. Spatial distribution and influencing factors  
595 on the variation of bacterial communities in an urban river sediment. *Environ. Pollut.* 272, 115984.  
596 <https://doi.org/10.1016/j.envpol.2020.115984>

- 597 Goffredi, S.K., Orphan, V.J., 2010. Bacterial community shifts in taxa and diversity in response to localized organic  
598 loading in the deep sea. *Environ. Microbiol.* 12, 344–363. <https://doi.org/10.1111/j.1462-2920.2009.02072.x>
- 599 Grabowski, R.C., Droppo, I.G., Wharton, G., 2011. Erodibility of cohesive sediment: The importance of sediment  
600 properties. *Earth-Sci. Rev.* 105, 101–120. <https://doi.org/10.1016/j.earscirev.2011.01.008>
- 601 Gu, Z., 2022. Complex heatmap visualization. *iMeta* 1. <https://doi.org/10.1002/imt2.43>
- 602 Gu, Z., Eils, R., Schlesner, M., 2016. Complex heatmaps reveal patterns and correlations in multidimensional  
603 genomic data. *Bioinformatics* 32, 2847–2849. <https://doi.org/10.1093/bioinformatics/btw313>
- 604 Gugliandolo, C., Michaud, L., Lo Giudice, A., Lentini, V., Rochera, C., Camacho, A., Maugeri, T.L., 2016.  
605 Prokaryotic community in lacustrine sediments of byers peninsula (Livingston Island, Maritime Antarctica). *Microb.*  
606 *Ecol.* 71, 387–400. <https://doi.org/10.1007/s00248-015-0666-8>
- 607 Guo, X., Niu, Z., Lu, D., Feng, J., Chen, Y., Tou, F., Liu, M., Yang, Y., 2017. Bacterial community structure in the  
608 intertidal biofilm along the Yangtze Estuary, China. *Mar. Pollut. Bull.* 124, 314–320.  
609 <https://doi.org/10.1016/j.marpolbul.2017.07.051>
- 610 Guo, X., Sun, X., Chen, Y., Hou, L., Liu, M., Yang, Y., 2020. Antibiotic resistance genes in biofilms on plastic wastes  
611 in an estuarine environment. *Sci. Total Environ.* 745, 140916. <https://doi.org/10.1016/j.scitotenv.2020.140916>
- 612 Hillyer, K.E., Raes, E., Bissett, A., Beale, D.J., 2023. Multi-omics eco-surveillance of bacterial community function  
613 in legacy contaminated estuary sediments. *Environ. Pollut.* 318, 120857.  
614 <https://doi.org/10.1016/j.envpol.2022.120857>
- 615 Hou, Y., Li, B., Feng, G., Zhang, C., He, J., Li, H., Zhu, J., 2021. Responses of bacterial communities and organic  
616 matter degradation in surface sediment to *Macrobrachium nipponense* bioturbation. *Sci. Total Environ.* 759, 143534.  
617 <https://doi.org/10.1016/j.scitotenv.2020.143534>
- 618 Huergo, L.F., Rissi, D.V., Elias, A.S., Gonçalves, M.V., Gernet, M.V., Barreto, F., Dahmer, G.W., Reis, R.A., Pedrosa,  
619 F.O., Souza, E.M., Monteiro, R.A., Baura, V.A., Balsanelli, E., Cruz, L.M., 2018. Influence of ancient anthropogenic  
620 activities on the mangrove soil microbiome. *Sci. Total Environ.* 645, 1–9.  
621 <https://doi.org/10.1016/j.scitotenv.2018.07.094>
- 622 Ismail, N., Almutairi, A., 2022. Bacterioplankton community profiling of the surface waters of Kuwait. *Front. Mar.*  
623 *Sci.* 9, 838101. <https://doi.org/10.3389/fmars.2022.838101>
- 624 Kaestli, M., Skillington, A., Kennedy, K., Majid, M., Williams, D., McGuinness, K., Munksgaard, N., Gibb, K.,  
625 2017. Spatial and temporal microbial patterns in a tropical macrotidal estuary subject to urbanization. *Front.*  
626 *Microbiol.* 8, 1313. <https://doi.org/10.3389/fmicb.2017.01313>
- 627 Kallmeyer, J., Pockalny, R., Adhikari, R.R., Smith, D.C., D’Hondt, S., 2012. Global distribution of microbial  
628 abundance and biomass in subseafloor sediment. *Proc. Natl. Acad. Sci.* 109, 16213–16216.  
629 <https://doi.org/10.1073/pnas.1203849109>
- 630 Kessler, A.J., Chen, Y.-J., Waite, D.W., Hutchinson, T., Koh, S., Popa, M.E., Beardall, J., Hugenholtz, P., Cook,  
631 P.L.M., Greening, C., 2019. Bacterial fermentation and respiration processes are uncoupled in anoxic permeable  
632 sediments. *Nat. Microbiol.* 4, 1014–1023. <https://doi.org/10.1038/s41564-019-0391-z>
- 633 Kessler, A.J., Glud, R.N., Cardenas, M.B., Cook, P.L.M., 2013. Transport zonation limits coupled nitrification-  
634 denitrification in permeable sediments. *Environ. Sci. Technol.* 47, 13404–13411. <https://doi.org/10.1021/es403318x>
- 635 Lai, X., Li, X., Song, J., Yuan, H., Duan, L., Li, N., Wang, Y., 2023. Nitrogen loss from the coastal shelf of the East  
636 China Sea: Implications of the organic matter. *Sci. Total Environ.* 854, 158805.  
637 <https://doi.org/10.1016/j.scitotenv.2022.158805>
- 638 Li, C., Adebayo, O., Ferguson, D.K., Wang, S., Rattray, J.E., Fowler, M., Webb, J., Campbell, C., Morrison, N.,  
639 MacDonald, A., Hubert, C.R.J., 2023. Bacterial anomalies associated with deep sea hydrocarbon seepage along the  
640 Scotian Slope. *Deep Sea Res. Part Oceanogr. Res. Pap.* 193, 103955. <https://doi.org/10.1016/j.dsr.2022.103955>

- 641 Li, M., Mi, T., Yu, Z., Ma, M., Zhen, Y., 2020. Planktonic bacterial and archaeal communities in an artificially  
642 irrigated estuarine wetland: diversity, distribution, and responses to environmental parameters. *Microorganisms* 8,  
643 198. <https://doi.org/10.3390/microorganisms8020198>
- 644 Li, M., Wei, G., Liu, J., Wang, X., Hou, L., Gao, Z., 2022. Effects of nitrate exposure on nitrate reduction processes  
645 in the wetland sediments from the Yellow River estuary. *Estuaries Coasts* 45, 315–330.  
646 <https://doi.org/10.1007/s12237-021-00966-7>
- 647 Liang, X., Peng, L.-H., Zhang, S., Zhou, S., Yoshida, A., Osatomi, K., Bellou, N., Guo, X.-P., Dobretsov, S., Yang,  
648 J.-L., 2019. Polyurethane, epoxy resin and polydimethylsiloxane altered biofilm formation and mussel settlement.  
649 *Chemosphere* 218, 599–608. <https://doi.org/10.1016/j.chemosphere.2018.11.120>
- 650 Liaw, A., Wiener, M., 2002. Classification and regression by randomForest. *R News* 2, 18–22.
- 651 Lindh, M.V., Sjöstedt, J., Andersson, A.F., Baltar, F., Hugerth, L.W., Lundin, D., Muthusamy, S., Legrand, C.,  
652 Pinhassi, J., 2015. Disentangling seasonal bacterioplankton population dynamics by high-frequency sampling: High-  
653 resolution temporal dynamics of marine bacteria. *Environ. Microbiol.* 17, 2459–2476. <https://doi.org/10.1111/1462-2920.12720>
- 654
- 655 Liu, C., Zhao, D., Ma, W., Guo, Y., Wang, A., Wang, Q., Lee, D.-J., 2016. Denitrifying sulfide removal process on  
656 high-salinity wastewaters in the presence of *Halomonas* sp. *Appl. Microbiol. Biotechnol.* 100, 1421–1426.  
657 <https://doi.org/10.1007/s00253-015-7039-6>
- 658 Liu, W., Xie, W., Zhao, Q., Zhu, K., Yu, R., 2014. Spatial distribution and ecological stoichiometry characteristics  
659 of carbon, nitrogen and phosphorus in soil in *Phragmites australis* tidal flat of Jiaozhou Bay. *Wetl. Sci.*  
660 <https://doi.org/10.13248/j.cnki.wetlandsci.2014.03.014>
- 661 Liu, X., Wu, J., Hong, Y., Jiao, L., Li, Y., Wang, L., Wang, Y., Chang, X., 2020. Nitrogen loss by *nirS*-type  
662 denitrifying bacterial communities in eutrophic coastal sediments. *Int. Biodeterior. Biodegrad.* 150, 104955.  
663 <https://doi.org/10.1016/j.ibiod.2020.104955>
- 664 Liu, Y.-X., Qin, Y., Chen, T., Lu, M., Qian, X., Guo, X., Bai, Y., 2021. A practical guide to amplicon and metagenomic  
665 analysis of microbiome data. *Protein Cell* 12, 315–330. <https://doi.org/10.1007/s13238-020-00724-8>
- 666 Louca, S., Parfrey, L.W., Doebeli, M., 2016. Decoupling function and taxonomy in the global ocean microbiome.  
667 *Science* 353, 1272–1277. <https://doi.org/10.1126/science.aaf4507>
- 668 Lu, M., Wang, X., Li, H., Jiao, J.J., Luo, X., Luo, M., Yu, S., Xiao, K., Li, X., Qiu, W., Zheng, C., 2022. Microbial  
669 community assembly and co-occurrence relationship in sediments of the river-dominated estuary and the adjacent  
670 shelf in the wet season. *Environ. Pollut.* 308, 119572. <https://doi.org/10.1016/j.envpol.2022.119572>
- 671 Luo, G., Fotidis, I.A., Angelidaki, I., 2016. Comparative analysis of taxonomic, functional, and metabolic patterns  
672 of microbiomes from 14 full-scale biogas reactors by metagenomic sequencing and radioisotopic analysis.  
673 *Biotechnol. Biofuels* 9, 51. <https://doi.org/10.1186/s13068-016-0465-6>
- 674 Lv, X., Ma, B., Yu, J., Chang, S.X., Xu, J., Li, Y., Wang, G., Han, G., Bo, G., Chu, X., 2016. Bacterial community  
675 structure and function shift along a successional series of tidal flats in the Yellow River Delta. *Sci. Rep.* 6, 36550.  
676 <https://doi.org/10.1038/srep36550>
- 677 Lyu, F., Han, F., Ge, C., Mao, W., Chen, L., Hu, H., Chen, G., Lang, Q., Fang, C., 2023. OmicStudio: A composable  
678 bioinformatics cloud platform with real-time feedback that can generate high-quality graphs for publication. *iMeta*  
679 2. <https://doi.org/10.1002/imt2.85>
- 680 Lyu, X., Zhao, C., Xia, C., Qiao, F., 2010. Numerical study of water exchange in the Jiaozhou Bay and the tidal  
681 residual currents near the bay mouth. *Acta Oceanol. Sin.* 32, 20–30.
- 682 Magoč, T., Salzberg, S.L., 2011. FLASH: fast length adjustment of short reads to improve genome assemblies.  
683 *Bioinformatics* 27, 2957–2963. <https://doi.org/10.1093/bioinformatics/btr507>
- 684 Mori, F., Umezawa, Y., Kondo, R., Nishihara, G.N., Wada, M., 2021. Potential oxygen consumption and community

685 composition of sediment bacteria in a seasonally hypoxic enclosed bay. *PeerJ* 9, e11836.  
686 <https://doi.org/10.7717/peerj.11836>

687 Morriën, E., Hannula, S.E., Snoek, L.B., Helmsing, N.R., Zweers, H., de Hollander, M., Soto, R.L., Bouffaud, M.-  
688 L., Buée, M., Dimmers, W., Duyts, H., Geisen, S., Giralanda, M., Griffiths, R.I., Jørgensen, H.-B., Jensen, J., Plassart,  
689 P., Redecker, D., Schmelz, R.M., Schmidt, O., Thomson, B.C., Tisserant, E., Uroz, S., Winding, A., Bailey, M.J.,  
690 Bonkowski, M., Faber, J.H., Martin, F., Lemanceau, P., de Boer, W., van Veen, J.A., van der Putten, W.H., 2017. Soil  
691 networks become more connected and take up more carbon as nature restoration progresses. *Nat. Commun.* 8, 14349.  
692 <https://doi.org/10.1038/ncomms14349>

693 Mougi, A., Kondoh, M., 2012. Diversity of interaction types and ecological community stability. *Science* 337, 349–  
694 351. <https://doi.org/10.1126/science.1220529>

695 Narihiro, T., Nobu, M.K., Kim, N.-K., Kamagata, Y., Liu, W.-T., 2015. The nexus of syntrophy-associated microbiota  
696 in anaerobic digestion revealed by long-term enrichment and community survey: Microbial community of syntrophic  
697 enrichment cultures. *Environ. Microbiol.* 17, 1707–1720. <https://doi.org/10.1111/1462-2920.12616>

698 Nocker, A., Lepo, J.E., Martin, L.L., Snyder, R.A., 2007. Response of estuarine biofilm microbial community  
699 development to changes in dissolved oxygen and nutrient concentrations. *Microb. Ecol.* 54, 532–542.  
700 <https://doi.org/10.1007/s00248-007-9236-z>

701 Offret, C., Gauthier, O., Despréaux, G., Bidault, A., Corporeau, C., Miner, P., Petton, B., Pernet, F., Fabioux, C.,  
702 Paillard, C., Le Blay, G., 2023. Microbiota of the digestive glands and extrapallial fluids of clams evolve differently  
703 over time depending on the intertidal position. *Microb. Ecol.* 85, 288–297. [https://doi.org/10.1007/s00248-022-](https://doi.org/10.1007/s00248-022-01959-0)  
704 01959-0

705 Oksanen, J., 2010. *Vegan: community ecology package.*

706 Oyetibo, G.O., Ige, O.O., Obinani, P.K., Amund, O.O., 2021. Ecological risk potentials of petroleum hydrocarbons  
707 and heavy metals shape the bacterial communities of marine hydrosphere at Atlantic Ocean, Atlas Cove, Nigeria. *J.*  
708 *Environ. Manage.* 289, 112563. <https://doi.org/10.1016/j.jenvman.2021.112563>

709 Parks, D.H., Tyson, G.W., Hugenholtz, P., Beiko, R.G., 2014. STAMP: statistical analysis of taxonomic and  
710 functional profiles. *Bioinformatics* 30, 3123–3124. <https://doi.org/10.1093/bioinformatics/btu494>

711 Paterson, D.M., 1989. Short-term changes in the erodibility of intertidal cohesive sediments related to the migratory  
712 behavior of epipelagic diatoms. *Limnol. Oceanogr.* 34, 223–234. <https://doi.org/10.4319/lo.1989.34.1.0223>

713 Pearce, D., Hodgson, D., Thorne, M., Burns, G., Cockell, C., 2013. Preliminary analysis of life within a former  
714 subglacial lake sediment in Antarctica. *Diversity* 5, 680–702. <https://doi.org/10.3390/d5030680>

715 Precht, E., Franke, U., Polerecky, L., Huettel, M., 2004. Oxygen dynamics in permeable sediments with wave-driven  
716 pore water exchange. *Limnol. Oceanogr.* 49, 693–705. <https://doi.org/10.4319/lo.2004.49.3.0693>

717 Qian, P.-Y., Lau, S.C.K., Dahms, H.-U., Dobretsov, S., Harder, T., 2007. Marine biofilms as mediators of colonization  
718 by marine macroorganisms: implications for antifouling and aquaculture. *Mar. Biotechnol.* 9, 399–410.  
719 <https://doi.org/10.1007/s10126-007-9001-9>

720 Regnell, O., Watras, Carl.J., 2019. Microbial mercury methylation in aquatic environments: a critical review of  
721 published field and laboratory studies. *Environ. Sci. Technol.* 53, 4–19. <https://doi.org/10.1021/acs.est.8b02709>

722 Reji, L., Tolar, B.B., Chavez, F.P., Francis, C.A., 2020. Depth-differentiation and seasonality of planktonic microbial  
723 assemblages in the Monterey Bay upwelling system. *Front. Microbiol.* 11, 1075.  
724 <https://doi.org/10.3389/fmicb.2020.01075>

725 Rickard, A.H., McBain, A.J., Stead, A.T., Gilbert, P., 2004. Shear rate moderates community diversity in freshwater  
726 biofilms. *Appl. Environ. Microbiol.* 70, 7426–7435. <https://doi.org/10.1128/AEM.70.12.7426-7435.2004>

727 Roggatz, C.C., Parsons, D.R., 2022. Potential climate change impacts on the abiotic degradation of acyl-homoserine  
728 lactones in the fluctuating conditions of marine biofilms. *Front. Mar. Sci.* 9, 882428.

- 729 <https://doi.org/10.3389/fmars.2022.882428>
- 730 Saad, S., Bhatnagar, S., Tegetmeyer, H.E., Geelhoed, J.S., Strous, M., Ruff, S.E., 2017. Transient exposure to oxygen  
731 or nitrate reveals ecophysiology of fermentative and sulfate-reducing benthic microbial populations: Ecophysiology  
732 of benthic microbial populations. *Environ. Microbiol.* 19, 4866–4881. <https://doi.org/10.1111/1462-2920.13895>
- 733 Shang, H., Xi, M., Li, Y., Kong, F., Wang, S., 2018. Evaluation of changes in the ecosystem services of Jiaozhou  
734 Bay coastal wetland. *Acta Ecol. Sin.* 38, 421–431. <https://doi.org/10.5846/stxb201608301763>
- 735 Suh, S.-S., Park, M., Hwang, J., Kil, E.-J., Jung, S.W., Lee, S., Lee, T.-K., 2015. Seasonal dynamics of marine  
736 microbial community in the South Sea of Korea. *PLOS ONE* 10, e0131633.  
737 <https://doi.org/10.1371/journal.pone.0131633>
- 738 Sun, J., Wei, L., Yin, R., Jiang, F., Shang, C., 2020. Microbial iron reduction enhances in-situ control of biogenic  
739 hydrogen sulfide by FeOOH granules in sediments of polluted urban waters. *Water Res.* 171, 115453.  
740 <https://doi.org/10.1016/j.watres.2019.115453>
- 741 Sun, Q., Song, J., Li, X., Yuan, H., Xing, J., 2021. Spatial variations of bacterial community composition in sediments  
742 of the Jiaozhou Bay, China. *J. Oceanol. Limnol.* 39, 865–879. <https://doi.org/10.1007/s00343-020-0127-1>
- 743 Tavares, T.C.L., Bezerra, W.M., Normando, L.R.O., Rosado, A.S., Melo, V.M.M., 2021. Brazilian semi-arid  
744 mangroves-associated microbiome as pools of richness and complexity in a changing world. *Front. Microbiol.* 12,  
745 715991. <https://doi.org/10.3389/fmicb.2021.715991>
- 746 Taylor, H.B., Kurtz, H.D., 2020. Microbial community structure shows differing levels of temporal stability in  
747 intertidal beach sands of the grand strand region of South Carolina. *PLOS ONE* 15, e0229387.  
748 <https://doi.org/10.1371/journal.pone.0229387>
- 749 Tebbe, D.A., Geihser, S., Wemheuer, B., Daniel, R., Schäfer, H., Engelen, B., 2022. Seasonal and zonal succession  
750 of bacterial communities in North Sea salt marsh sediments. *Microorganisms* 10, 859.  
751 <https://doi.org/10.3390/microorganisms10050859>
- 752 Thomas, F.A., Sinha, R.K., Krishnan, K.P., 2020. Bacterial community structure of a glacio-marine system in the  
753 Arctic (Ny-Ålesund, Svalbard). *Sci. Total Environ.* 718, 135264. <https://doi.org/10.1016/j.scitotenv.2019.135264>
- 754 Thomson, T., Ellis, J.I., Fusi, M., Prinz, N., Bennett-Smith, M.F., Aylagas, E., Carvalho, S., Jones, B.H., 2022. The  
755 right place at the right time: Seasonal variation of bacterial communities in arid *Avicennia marina* soils in the Red  
756 Sea is specific to its position in the intertidal. *Front. Ecol. Evol.* 10, 845611.  
757 <https://doi.org/10.3389/fevo.2022.845611>
- 758 van de Kamp, J., Hook, S.E., Williams, A., Tanner, J.E., Bodrossy, L., 2019. Baseline characterization of aerobic  
759 hydrocarbon degrading microbial communities in deep-sea sediments of the Great Australian Bight, Australia.  
760 *Environ. Microbiol.* 21, 1782–1797. <https://doi.org/10.1111/1462-2920.14559>
- 761 Wahl, M., Goecke, F., Labes, A., Dobretsov, S., Weinberger, F., 2012. The second skin: ecological role of epibiotic  
762 biofilms on marine organisms. *Front. Microbiol.* 3. <https://doi.org/10.3389/fmicb.2012.00292>
- 763 Wang, H., Zhang, C., Chen, F., Kan, J., 2020. Spatial and temporal variations of bacterioplankton in the Chesapeake  
764 Bay: A re-examination with high-throughput sequencing analysis. *Limnol. Oceanogr.* 65, 3032–3045.  
765 <https://doi.org/10.1002/lno.11572>
- 766 Wang, Y., Zhang, C., Qi, L., Jia, X., Lu, W., 2016. Diversity and antimicrobial activities of cultivable bacteria isolated  
767 from Jiaozhou Bay. *Acta Microbiol. Sin.* <https://doi.org/10.13343/j.cnki.wsxb.20160132>
- 768 Wang, Z., Gao, S., Sun, Z., Zhang, Y., Zhang, X., 2022. Study on the effects of rainfall and ecological water  
769 supplement on the pollutant transport in Licun River. *Trans. Oceanol. Limnol.* <https://doi.org/10.13984/j.cnki.cn37-1141.2022.03.012>
- 770
- 771 Wei, W., Isobe, K., Nishizawa, T., Zhu, L., Shiratori, Y., Ohte, N., Koba, K., Otsuka, S., Senoo, K., 2015. Higher  
772 diversity and abundance of denitrifying microorganisms in environments than considered previously. *ISME J.* 9,



- 773 1954–1965. <https://doi.org/10.1038/ismej.2015.9>
- 774 Wei, Z., Liu, Y., Feng, K., Li, S., Wang, S., Jin, D., Zhang, Y., Chen, H., Yin, H., Xu, M., Deng, Y., 2018. The  
775 divergence between fungal and bacterial communities in seasonal and spatial variations of wastewater treatment  
776 plants. *Sci. Total Environ.* 628–629, 969–978. <https://doi.org/10.1016/j.scitotenv.2018.02.003>
- 777 Whitehouse, R., 2000. *Dynamics of estuarine muds: A manual for practical applications*. Thomas Telford.
- 778 Wu, D., Huang, X.-H., Sun, J.-Z., Graham, D.W., Xie, B., 2017. Antibiotic resistance genes and associated microbial  
779 community conditions in aging landfill systems. *Environ. Sci. Technol.* 51, 12859–12867.  
780 <https://doi.org/10.1021/acs.est.7b03797>
- 781 Wu, J., Hong, Y., Ye, J., Li, Yiben, Liu, X., Jiao, L., Li, T., Li, Yuwei, Bin, L., Wang, Y., 2019. Diversity of anammox  
782 bacteria and contribution to the nitrogen loss in surface sediment. *Int. Biodeterior. Biodegrad.* 142, 227–234.  
783 <https://doi.org/10.1016/j.ibiod.2019.05.018>
- 784 Wyness, A.J., Paterson, D.M., Rimmer, J.E.V., Defew, E.C., Stutter, M.I., Avery, L.M., 2019. Assessing risk of *E.*  
785 *coli* resuspension from intertidal estuarine sediments: implications for water quality. *Int. J. Environ. Res. Public.*  
786 *Health* 16, 3255. <https://doi.org/10.3390/ijerph16183255>
- 787 Yi, J., Lo, L.S.H., Cheng, J., 2020. Dynamics of microbial community structure and ecological functions in estuarine  
788 intertidal sediments. *Front. Mar. Sci.* 7, 585970. <https://doi.org/10.3389/fmars.2020.585970>
- 789 Zhang, J., Zhang, N., Liu, Y.-X., Zhang, X., Hu, B., Qin, Y., Xu, H., Wang, H., Guo, X., Qian, J., Wang, W., Zhang,  
790 P., Jin, T., Chu, C., Bai, Y., 2018. Root microbiota shift in rice correlates with resident time in the field and  
791 developmental stage. *Sci. China Life Sci.* 61, 613–621. <https://doi.org/10.1007/s11427-018-9284-4>
- 792 Zhang, W., Tang, J., Liang, B., 2017. Numerical study on the influence of the forebay reclamation on pollutant  
793 transport in the Jiaozhou bay. *Mar. Environ. Sci.* <https://doi.org/10.13634/j.cnki.mes.2017.01.005>
- 794 Zhang, X., Hu, B.X., Ren, H., Zhang, J., 2018. Composition and functional diversity of microbial community across  
795 a mangrove-inhabited mudflat as revealed by 16S rDNA gene sequences. *Sci. Total Environ.* 633, 518–528.  
796 <https://doi.org/10.1016/j.scitotenv.2018.03.158>
- 797 Zhou, Z., Meng, H., Liu, Y., Gu, J.-D., Li, M., 2017. Stratified bacterial and archaeal community in mangrove and  
798 intertidal wetland mudflats revealed by high throughput 16S rRNA gene sequencing. *Front. Microbiol.* 8, 2148.  
799 <https://doi.org/10.3389/fmicb.2017.02148>
- 800 Zhuang, L., Tang, Z., Ma, J., Yu, Z., Wang, Y., Tang, J., 2019. Enhanced anaerobic biodegradation of benzoate under  
801 sulfate-reducing conditions with conductive iron-oxides in sediment of Pearl River Estuary. *Front. Microbiol.* 10,  
802 374. <https://doi.org/10.3389/fmicb.2019.00374>
- 803 Zinke, L.A., Mullis, M.M., Bird, J.T., Marshall, I.P.G., Jørgensen, B.B., Lloyd, K.G., Amend, J.P., Kiel Reese, B.,  
804 2017. Thriving or surviving? Evaluating active microbial guilds in Baltic Sea sediment: Baltic Sea sediment  
805 metatranscriptomes. *Environ. Microbiol. Rep.* 9, 528–536. <https://doi.org/10.1111/1758-2229.12578>
- 806
